# Supplementary material
Source: publisher figshare collection journal article supplement (https://asha.figshare.com/articles/dataset/_/16834627)
Supplement: Supplementary file 1 [file 1]

## Supplemental Material S1. Word lists of six themes for picture naming test.

### (a) Theme I: Vegetables

| Set 1:          |                             | First Syllable    |                |                             | Second Syllable  |                |  |
|-----------------|-----------------------------|-------------------|----------------|-----------------------------|------------------|----------------|--|
| Trained Words   | Initial                     | Final             | Tone           | Initial                     | Final            | Tone           |  |
| 土豆 (potato)     | <i>t</i> [t <sup>h</sup> ]  | <i>u</i> [u]      | <b>T3 [21]</b> | <i>d</i> [t]                | <i>ou</i> [ou]   | T4 [51]        |  |
| 茄子 (eggplant)   | <i>q</i> [tɕ <sup>h</sup> ] | <i>ie</i> [iɛ]    | T2 [35]        | <i>z</i> [ts]               | <i>-i</i> [ɿ]    | [neutral tone] |  |
| 白菜 (cabbage)    | <i>b</i> [p]                | <i>ai</i> [ai]    | T2 [35]        | <i>c</i> [ts <sup>h</sup> ] | <i>ai</i> [ai]   | T4 [51]        |  |
| 萝卜 (radish)     | <i>l</i> [l]                | <i>uo</i> [uo]    | T2 [35]        | <i>b</i> [p]                | <i>o</i> [o]     | [neutral tone] |  |
| 辣椒 (chili)      | <i>l</i> [l]                | <i>a</i> [A]      | T4 [51]        | <i>j</i> [tɕ]               | <i>iao</i> [iau] | T1 [55]        |  |
| 玉米 (corn)       | <i>Ø</i>                    | <i>ü</i> [y]      | T4 [51]        | <i>m</i> [m]                | <i>i</i> [i]     | T3 [214]       |  |
| 大蒜 (garlic)     | <i>d</i> [t]                | <i>a</i> [A]      | T4 [51]        | <i>s</i> [s]                | <i>uan</i> [uan] | T4 [51]        |  |
| 黄瓜 (cucumber)   | <i>h</i> [x]                | <i>uang</i> [uaŋ] | T2 [35]        | <i>g</i> [k]                | <i>ua</i> [uA]   | T1 [55]        |  |
| 木耳 (agaric)     | <i>m</i> [m]                | <i>u</i> [u]      | T4 [51]        | <i>Ø</i>                    | <i>er</i> [ɤ]    | T3 [214]       |  |
| 芹菜 (celery)     | <i>q</i> [tɕ <sup>h</sup> ] | <i>in</i> [in]    | T2 [35]        | <i>c</i> [ts <sup>h</sup> ] | <i>ai</i> [ai]   | T4 [51]        |  |
| Set 2:          |                             | First Syllable    |                |                             | Second Syllable  |                |  |
| Untrained Words | Initial                     | Final             | Tone           | Initial                     | Final            | Tone           |  |
| 南瓜 (pumpkin)    | <i>n</i> [n]                | <i>an</i> [an]    | T2 [35]        | <i>g</i> [k]                | <i>ua</i> [uA]   | T1 [55]        |  |
| 洋葱 (onion)      | <i>Ø</i>                    | <i>iang</i> [iaŋ] | T2 [35]        | <i>c</i> [ts <sup>h</sup> ] | <i>ong</i> [oŋ]  | T1 [55]        |  |

### (b) Theme II: Fruits

| Set 1:          |                              | First Syllable    |         |                            | Second Syllable  |                |  |
|-----------------|------------------------------|-------------------|---------|----------------------------|------------------|----------------|--|
| Trained Words   | Initial                      | Final             | Tone    | Initial                    | Final            | Tone           |  |
| 苹果 (apple)      | <i>p</i> [p <sup>h</sup> ]   | <i>ing</i> [iŋ]   | T2 [35] | <i>g</i> [k]               | <i>uo</i> [uo]   | T3 [214]       |  |
| 香蕉 (banana)     | <i>x</i> [ɕ]                 | <i>iang</i> [iaŋ] | T1 [55] | <i>j</i> [tɕ]              | <i>iao</i> [iau] | T1 [55]        |  |
| 葡萄 (grape)      | <i>p</i> [p <sup>h</sup> ]   | <i>u</i> [u]      | T2 [35] | <i>t</i> [t <sup>h</sup> ] | <i>ao</i> [au]   | [neutral tone] |  |
| 橙子 (orange)     | <i>ch</i> [tɕ <sup>h</sup> ] | <i>eng</i> [ɛŋ]   | T2 [35] | <i>z</i> [ts]              | <i>-i</i> [ɿ]    | [neutral tone] |  |
| 西瓜 (watermelon) | <i>x</i> [ɕ]                 | <i>i</i> [i]      | T1 [55] | <i>g</i> [k]               | <i>ua</i> [uA]   | T1 [55]        |  |

|                  |                |                 |                |                 |                  |                |
|------------------|----------------|-----------------|----------------|-----------------|------------------|----------------|
| 草莓 (strawberry)  | <i>c</i> [tʰ]  | <i>ao</i> [ɑu]  | <b>T3 [21]</b> | <i>m</i> [m]    | <i>ei</i> [ei]   | T2 [35]        |
| 芒果 (mango)       | <i>m</i> [m]   | <i>ang</i> [aŋ] | T2 [35]        | <i>g</i> [k]    | <i>uo</i> [uo]   | T3 [214]       |
| 菠萝 (pineapple)   | <i>b</i> [p]   | <i>o</i> [o]    | T1 [55]        | <i>l</i> [l]    | <i>uo</i> [uo]   | T2 [35]        |
| 石榴 (pomegranate) | <i>sh</i> [ʃ]  | <i>-i</i> [ɿ]   | T2 [35]        | <i>l</i> [l]    | <i>iu</i> [iou]  | [neutral tone] |
| 桂圆 (longan)      | <i>g</i> [k]   | <i>ui</i> [uei] | T4 [51]        | <i>Ø</i>        | <i>üan</i> [yæn] | T2 [35]        |
| Set 2:           | First Syllable |                 |                | Second Syllable |                  |                |
| Untrained Words  | Initial        | Final           | Tone           | Initial         | Final            | Tone           |
| 柠檬 (lemon)       | <i>n</i> [n]   | <i>ing</i> [iŋ] | T2 [35]        | <i>m</i> [m]    | <i>eng</i> [əŋ]  | T2 [35]        |
| 樱桃 (cherry)      | <i>Ø</i>       | <i>ing</i> [iŋ] | T1 [55]        | <i>t</i> [tʰ]   | <i>ao</i> [ɑu]   | T2 [35]        |

(c) Theme III: Animals

|                 |                |                   |                |                 |                   |                |
|-----------------|----------------|-------------------|----------------|-----------------|-------------------|----------------|
| Set 1:          | First Syllable |                   |                | Second Syllable |                   |                |
| Trained Words   | Initial        | Final             | Tone           | Initial         | Final             | Tone           |
| 老虎 (tiger)      | <i>l</i> [l]   | <i>ao</i> [ɑu]    | <b>T3 [35]</b> | <i>h</i> [x]    | <i>u</i> [u]      | T3 [214]       |
| 大象 (elephant)   | <i>d</i> [t]   | <i>a</i> [A]      | T4 [51]        | <i>x</i> [ɛ]    | <i>iang</i> [iaŋ] | T4 [51]        |
| 熊猫 (panda)      | <i>x</i> [ɛ]   | <i>iong</i> [jɔŋ] | T2 [35]        | <i>m</i> [m]    | <i>ao</i> [ɑu]    | T1 [55]        |
| 斑马 (zebra)      | <i>b</i> [p]   | <i>an</i> [an]    | T1 [55]        | <i>m</i> [m]    | <i>a</i> [A]      | T3 [214]       |
| 蝴蝶 (butterfly)  | <i>h</i> [x]   | <i>u</i> [u]      | T2 [35]        | <i>d</i> [t]    | <i>ie</i> [iɛ]    | T2 [35]        |
| 乌龟 (tortoise)   | <i>Ø</i>       | <i>u</i> [u]      | T1 [55]        | <i>g</i> [k]    | <i>ui</i> [uei]   | T1 [55]        |
| 嗡嗡 (buzz)       | <i>Ø</i>       | <i>ueng</i> [uəŋ] | T1 [55]        | <i>Ø</i>        | <i>ueng</i> [uəŋ] | T1 [55]        |
| 孔雀 (peacock)    | <i>k</i> [kʰ]  | <i>ong</i> [ɔŋ]   | <b>T3 [21]</b> | <i>q</i> [tɕʰ]  | <i>üe</i> [yɛ]    | T4 [51]        |
| 蚊子 (mosquito)   | <i>Ø</i>       | <i>uen</i> [uən]  | T2 [35]        | <i>z</i> [ts]   | <i>-i</i> [ɿ]     | [neutral tone] |
| 企鹅 (penguin)    | <i>q</i> [tɕʰ] | <i>i</i> [i]      | <b>T3 [21]</b> | <i>Ø</i>        | <i>e</i> [ɤ]      | T2 [35]        |
| Set 2:          | First Syllable |                   |                | Second Syllable |                   |                |
| Untrained Words | Initial        | Final             | Tone           | Initial         | Final             | Tone           |
| 兔子 (rabbit)     | <i>t</i> [tʰ]  | <i>u</i> [u]      | T4 [51]        | <i>z</i> [ts]   | <i>-i</i> [ɿ]     | [neutral tone] |
| 小狗 (puppy)      | <i>x</i> [ɛ]   | <i>iao</i> [iau]  | <b>T3 [35]</b> | <i>g</i> [k]    | <i>ou</i> [ou]    | T3 [214]       |

(d) Theme IV: Daily Necessities

| Set 1:          | First Syllable             |                  |                | Second Syllable            |                 |                |
|-----------------|----------------------------|------------------|----------------|----------------------------|-----------------|----------------|
| Trained Words   | Initial                    | Final            | Tone           | Initial                    | Final           | Tone           |
| 牙刷 (toothbrush) | <i>Ø</i>                   | <i>ia</i> [iA]   | T2 [35]        | <i>sh</i> [ʃ]              | <i>ua</i> [uA]  | T1 [55]        |
| 毛巾 (towel)      | <i>m</i> [m]               | <i>ao</i> [au]   | T2 [35]        | <i>j</i> [tɕ]              | <i>in</i> [in]  | T1 [55]        |
| 筷子 (chopsticks) | <i>k</i> [k <sup>h</sup> ] | <i>uai</i> [uai] | T4 [51]        | <i>z</i> [ts]              | <i>-i</i> [ɿ]   | [neutral tone] |
| 水杯 (glass)      | <i>sh</i> [ʃ]              | <i>ui</i> [uei]  | <b>T3 [21]</b> | <i>b</i> [p]               | <i>ei</i> [ei]  | T1 [55]        |
| 拖把 (mop)        | <i>t</i> [t <sup>h</sup> ] | <i>uo</i> [uo]   | T1 [55]        | <i>b</i> [p]               | <i>a</i> [A]    | T3 [214]       |
| 马桶 (toilet)     | <i>m</i> [m]               | <i>a</i> [A]     | <b>T3 [35]</b> | <i>t</i> [t <sup>h</sup> ] | <i>ong</i> [oŋ] | T3 [214]       |
| 枕头 (pillow)     | <i>zh</i> [tʃ]             | <i>en</i> [ən]   | <b>T3 [21]</b> | <i>t</i> [t <sup>h</sup> ] | <i>ou</i> [ou]  | [neutral tone] |
| 手套 (gloves)     | <i>sh</i> [ʃ]              | <i>ou</i> [ou]   | <b>T3 [21]</b> | <i>t</i> [t <sup>h</sup> ] | <i>ao</i> [au]  | T4 [51]        |
| 衣架 (hanger)     | <i>Ø</i>                   | <i>i</i> [i]     | T1 [55]        | <i>j</i> [tɕ]              | <i>ia</i> [iA]  | T4 [51]        |
| 台灯 (lamp)       | <i>t</i> [t <sup>h</sup> ] | <i>ai</i> [ai]   | T2 [35]        | <i>d</i> [t]               | <i>eng</i> [əŋ] | T1 [55]        |
| Set 2:          | First Syllable             |                  |                | Second Syllable            |                 |                |
| Untrained Words | Initial                    | Final            | Tone           | Initial                    | Final           | Tone           |
| 雨伞 (umbrella)   | <i>Ø</i>                   | <i>ü</i> [y]     | <b>T3 [35]</b> | <i>s</i> [s]               | <i>an</i> [an]  | T3 [214]       |
| 闹钟(alarm clock) | <i>n</i> [n]               | <i>ao</i> [au]   | T4 [51]        | <i>zh</i> [tʃ]             | <i>ong</i> [oŋ] | T1 [55]        |

(e) Theme V: Snacks

| Set 1:            | First Syllable               |                  |                | Second Syllable            |                 |          |
|-------------------|------------------------------|------------------|----------------|----------------------------|-----------------|----------|
| Trained Words     | Initial                      | Final            | Tone           | Initial                    | Final           | Tone     |
| 饼干 (cookies)      | <i>b</i> [p]                 | <i>ing</i> [iŋ]  | <b>T3 [21]</b> | <i>g</i> [k]               | <i>an</i> [an]  | T1 [55]  |
| 软糖 (fudge)        | <i>r</i> [ʒ]                 | <i>uan</i> [uan] | <b>T3 [21]</b> | <i>t</i> [t <sup>h</sup> ] | <i>ang</i> [aŋ] | T2 [35]  |
| 面包 (bread)        | <i>m</i> [m]                 | <i>ian</i> [ian] | T4 [51]        | <i>b</i> [p]               | <i>ao</i> [au]  | T1 [55]  |
| 牛奶 (milk)         | <i>n</i> [n]                 | <i>iu</i> [iou]  | T2 [35]        | <i>n</i> [n]               | <i>ai</i> [ai]  | T3 [214] |
| 海苔 (seaweed)      | <i>h</i> [x]                 | <i>ai</i> [ai]   | <b>T3 [21]</b> | <i>t</i> [t <sup>h</sup> ] | <i>ai</i> [ai]  | T2 [35]  |
| 橙汁 (orange juice) | <i>ch</i> [tʃ <sup>h</sup> ] | <i>eng</i> [əŋ]  | T2 [35]        | <i>zh</i> [tʃ]             | <i>-i</i> [ɿ]   | T1 [55]  |
| 瓜子(melon seeds)   | <i>g</i> [k]                 | <i>ua</i> [uA]   | T1 [55]        | <i>z</i> [ts]              | <i>-i</i> [ɿ]   | T3 [214] |

|                   |                |                   |                |                              |                  |                |
|-------------------|----------------|-------------------|----------------|------------------------------|------------------|----------------|
| 薯片 (potato chips) | <i>sh</i> [ʃ]  | <i>u</i> [u]      | <b>T3 [21]</b> | <i>p</i> [p <sup>h</sup> ]   | <i>ian</i> [ian] | T4 [51]        |
| 麻花 (bread twist)  | <i>m</i> [m]   | <i>a</i> [a]      | T2 [35]        | <i>h</i> [x]                 | <i>ua</i> [ua]   | T1 [55]        |
| 核桃 (walnut)       | <i>h</i> [x]   | <i>e</i> [ɤ]      | T2 [35]        | <i>t</i> [t <sup>h</sup> ]   | <i>ao</i> [au]   | [neutral tone] |
| Set 2:            | First Syllable |                   |                | Second Syllable              |                  |                |
| Untrained Words   | Initial        | Final             | Tone           | Initial                      | Final            | Tone           |
| 蛋糕 (cake)         | <i>d</i> [t]   | <i>an</i> [an]    | T4 [51]        | <i>g</i> [k]                 | <i>ao</i> [au]   | T1 [55]        |
| 香肠 (sausage)      | <i>x</i> [ɐ]   | <i>iang</i> [ian] | T1 [55]        | <i>ch</i> [tɕ <sup>h</sup> ] | <i>ang</i> [aŋ]  | T2 [35]        |

(f) Theme VI: Toys

|                 |                             |                 |                |                              |                   |                |
|-----------------|-----------------------------|-----------------|----------------|------------------------------|-------------------|----------------|
| Set 1:          | First Syllable              |                 |                | Second Syllable              |                   |                |
| Trained Words   | Initial                     | Final           | Tone           | Initial                      | Final             | Tone           |
| 积木 (toy blocks) | <i>j</i> [tɕ]               | <i>i</i> [i]    | T1 [55]        | <i>m</i> [m]                 | <i>u</i> [u]      | T4 [51]        |
| 气球 (balloon)    | <i>q</i> [tɕ <sup>h</sup> ] | <i>i</i> [i]    | T4 [51]        | <i>q</i> [tɕ <sup>h</sup> ]  | <i>iu</i> [iou]   | T2 [35]        |
| 拼图 (puzzle)     | <i>p</i> [p <sup>h</sup> ]  | <i>in</i> [in]  | T1 [55]        | <i>t</i> [t <sup>h</sup> ]   | <i>u</i> [u]      | T2 [35]        |
| 彩泥 (color-mud)  | <i>c</i> [ts <sup>h</sup> ] | <i>ai</i> [ai]  | <b>T3 [21]</b> | <i>n</i> [n]                 | <i>i</i> [i]      | T2 [35]        |
| 滑梯 (slide)      | <i>h</i> [x]                | <i>ua</i> [ua]  | T2 [35]        | <i>t</i> [t <sup>h</sup> ]   | <i>i</i> [i]      | T1 [55]        |
| 秋千 (swing)      | <i>q</i> [tɕ <sup>h</sup> ] | <i>iu</i> [iou] | T1 [55]        | <i>q</i> [tɕ <sup>h</sup> ]  | <i>ian</i> [ian]  | T1 [55]        |
| 魔方 (magic cube) | <i>m</i> [m]                | <i>o</i> [o]    | T2 [35]        | <i>f</i> [f]                 | <i>ang</i> [aŋ]   | T1 [55]        |
| 风车 (windmill)   | <i>f</i> [f]                | <i>eng</i> [əŋ] | T1 [55]        | <i>ch</i> [tɕ <sup>h</sup> ] | <i>e</i> [ɤ]      | T1 [55]        |
| 铃铛 (bell)       | <i>l</i> [l]                | <i>ing</i> [iŋ] | T2 [35]        | <i>d</i> [t]                 | <i>ang</i> [aŋ]   | [neutral tone] |
| 水枪 (water gun)  | <i>sh</i> [ʃ]               | <i>ui</i> [uei] | <b>T3 [21]</b> | <i>q</i> [tɕ <sup>h</sup> ]  | <i>iang</i> [ian] | T1 [55]        |
| Set 2:          | First Syllable              |                 |                | Second Syllable              |                   |                |
| Untrained Words | Initial                     | Final           | Tone           | Initial                      | Final             | Tone           |
| 足球 (football)   | <i>z</i> [ts]               | <i>u</i> [u]    | T2 [35]        | <i>q</i> [tɕ <sup>h</sup> ]  | <i>iu</i> [iou]   | T2 [35]        |
| 口哨 (whistle)    | <i>k</i> [k <sup>h</sup> ]  | <i>ou</i> [ou]  | <b>T3 [21]</b> | <i>sh</i> [ʃ]                | <i>ao</i> [au]    | T4 [51]        |

*Note.* *Italics* represent *Pinyin*, an alphabetic phonological coding system widely used in mainland China, and the corresponding transcriptions of the International Phonetic Alphabet (IPA) in square brackets. The symbol ‘Ø’ means zero onset in Mandarin initials. There are four Mandarin citation tones, traditionally characterized as Tone 1 (T1), Tone 2 (T2), Tone 3 (T3), and Tone 4 (T4). T1 [55] is a high-level tone, T2 [35] is a mid-rising tone, T3 [214] is a dipping (i.e., falling-

rising) tone, and T4 [51] is a high-falling tone, with digits in square brackets referring to tone transcriptions in Chao’s tone letters (Chao, 1930). The bold tone numbers indicate the surface tone realizations of T3 after the process of tone sandhi.
