# Supplementary material
Source: publisher figshare collection journal article supplement (https://asha.figshare.com/articles/dataset/_/16834627)
Supplement: Supplementary file 2 [file 1]

**Supplemental Material S3.** Five aspects of user experience.

Note: Please evaluate the degree of user experience for your own student.

Student Name:

| Aspect      | Description                                                                                                                           | Score (5 – the highest degree, 1 – the lowest degree) |   |   |   |   |
|-------------|---------------------------------------------------------------------------------------------------------------------------------------|-------------------------------------------------------|---|---|---|---|
|             |                                                                                                                                       | 1                                                     | 2 | 3 | 4 | 5 |
| enjoyment   | The degree of apparent pleasure in the learning process (the more smiling, the higher degree)                                         |                                                       |   |   |   |   |
| cooperation | The degree of collaboration in learning a trial (whether the child could follow all the five steps within a trial)                    |                                                       |   |   |   |   |
| consistency | The continuity of the overall coordination throughout the learning process (whether the cooperation persists across different trials) |                                                       |   |   |   |   |
| interest    | The degree of apparent interest in the training materials (whether the child eagers to learn <b>during</b> treatment sessions)        |                                                       |   |   |   |   |
| motivation  | The degree of the apparent initiative <b>before</b> treatment sessions (whether the child appears to want to participate in training) |                                                       |   |   |   |   |
